# Supplementary material for: Determination of Brain Tissue Samples Storage Conditions for Reproducible Intraoperative Lipid Profiling
Source: MDPI journal article supplement (doi:10.3390/molecules27082587), 2022-04-18
Supplement: s1 [file s1]

## Determination of brain tissue samples storage conditions for reproducible intraoperative lipid profiling

Stanislav I. Pekov, Evgeny S. Zhvansky, Vasily A. Elifеров, Anatoly A. Sorokin, Daniil G. Ivanov, Eugene N. Nikolaev, Igor A. Popov

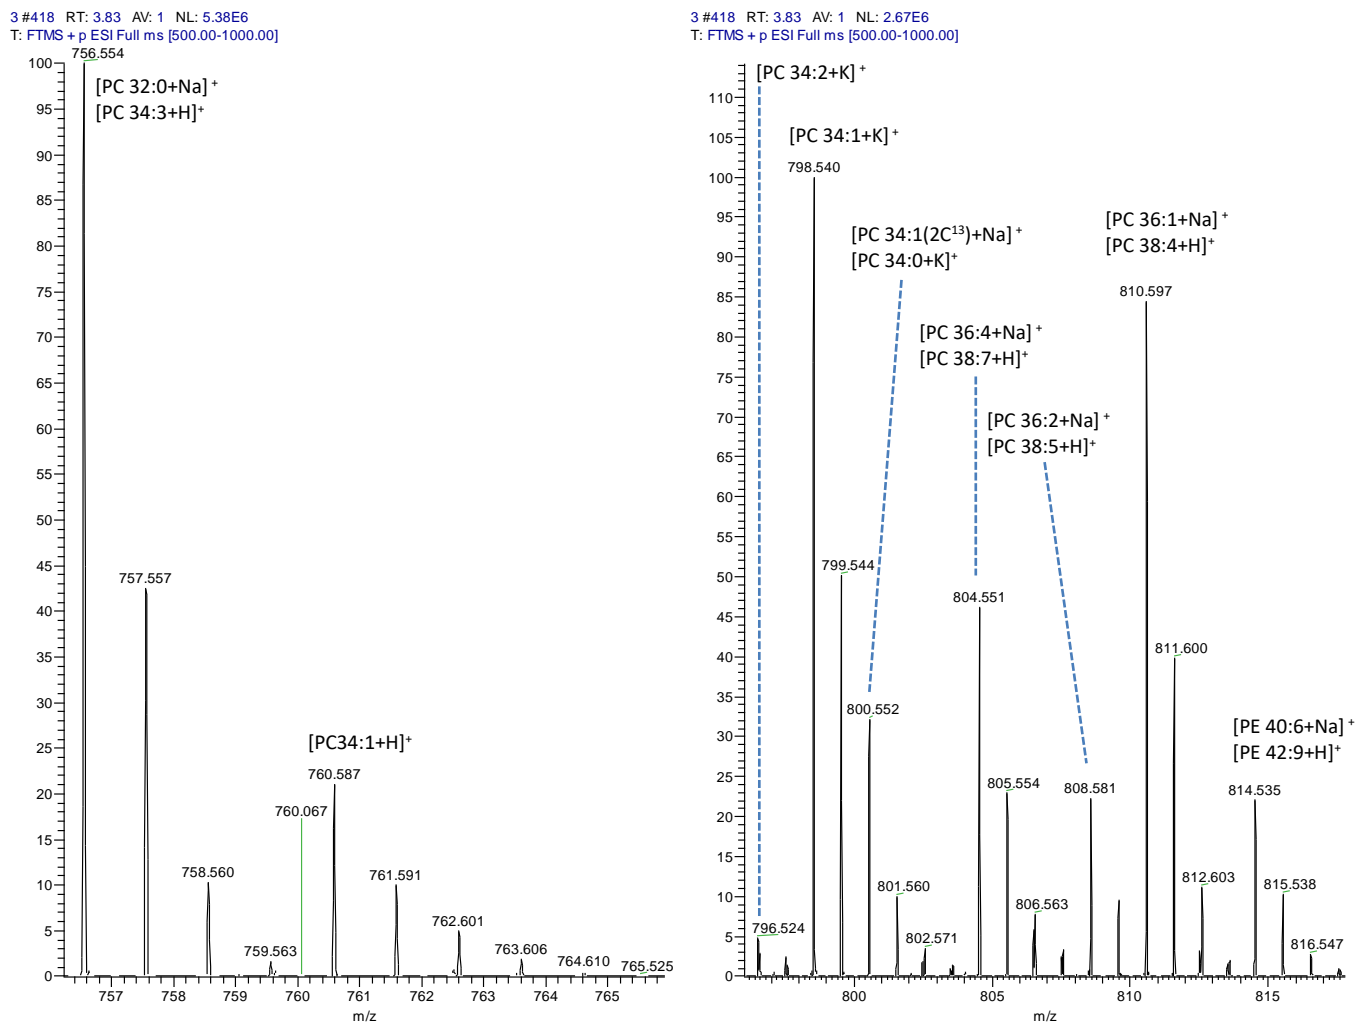

**Figure S1.** Mass spectra of rat brain tissue sample after 70 minutes incubation in normal saline at room temperature. Positive ion mode. The annotations for the monoisotopic peaks are based on accurate masses. The isotopic distribution is matched to the proposed lipid identifications. However, the presence of alkaline adducts precludes unambiguous identification.

1 #147 RT: 1.51 AV: 1 NL: 6.71E5  
T: FTMS - p ESI Full ms [500.00-1000.00]

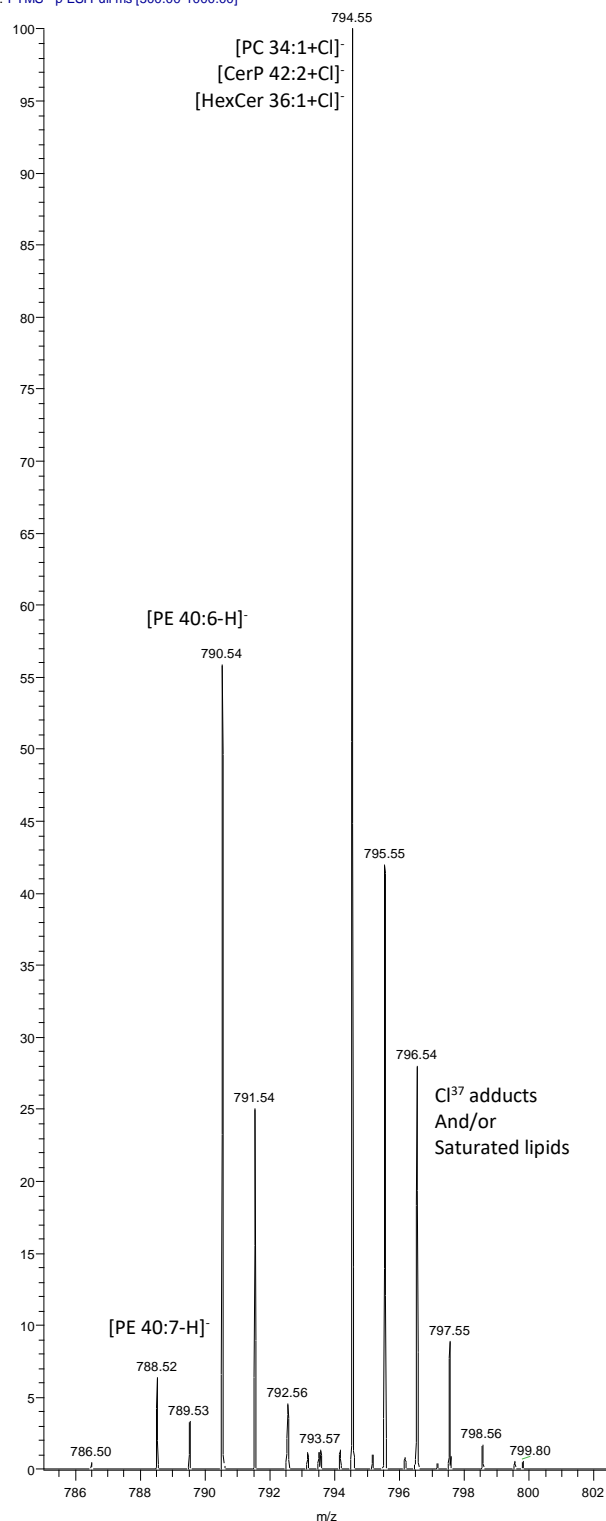

1 #147 RT: 1.51 AV: 1 NL: 1.74E5  
T: FTMS - p ESI Full ms [500.00-1000.00]

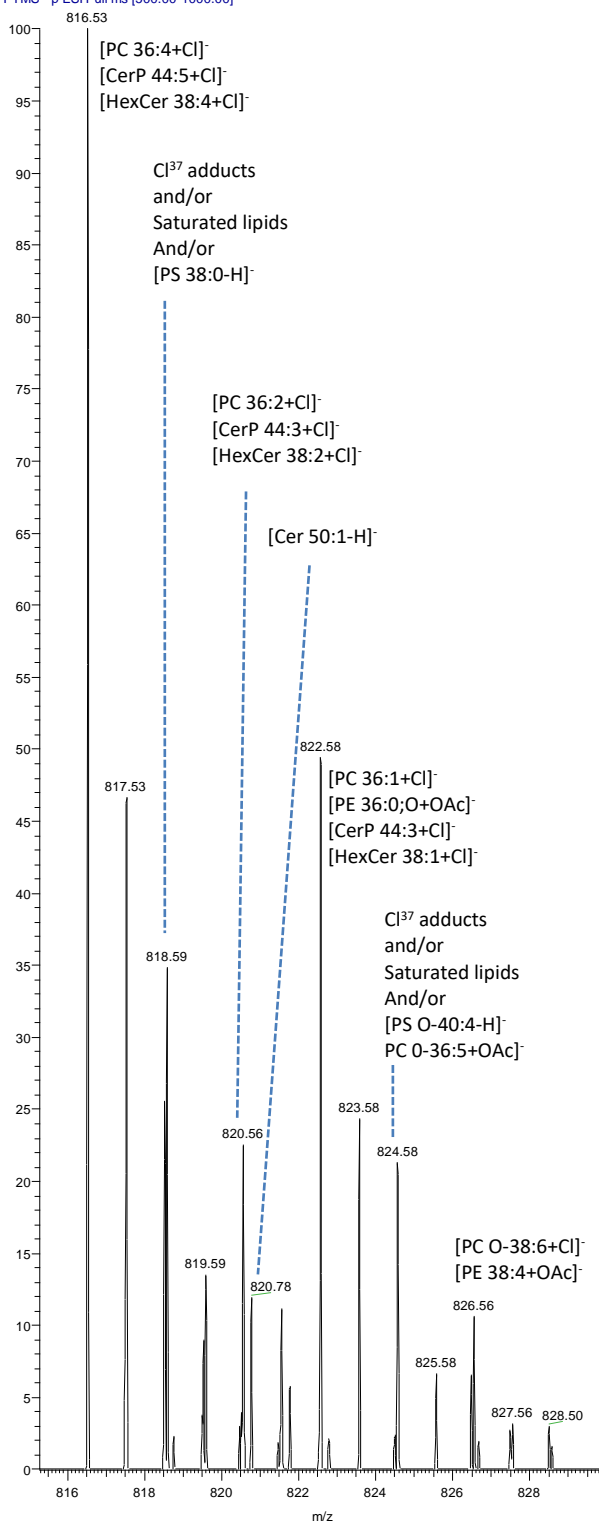

**Figure S2.** Mass spectra of rat brain tissue sample analyzed immediately after dissection. Negative ion mode. The annotations for the monoisotopic peaks are based on accurate masses. The isotopic distribution is matched to the proposed lipid identifications. However, the presence of various adducts precludes unambiguous identification.

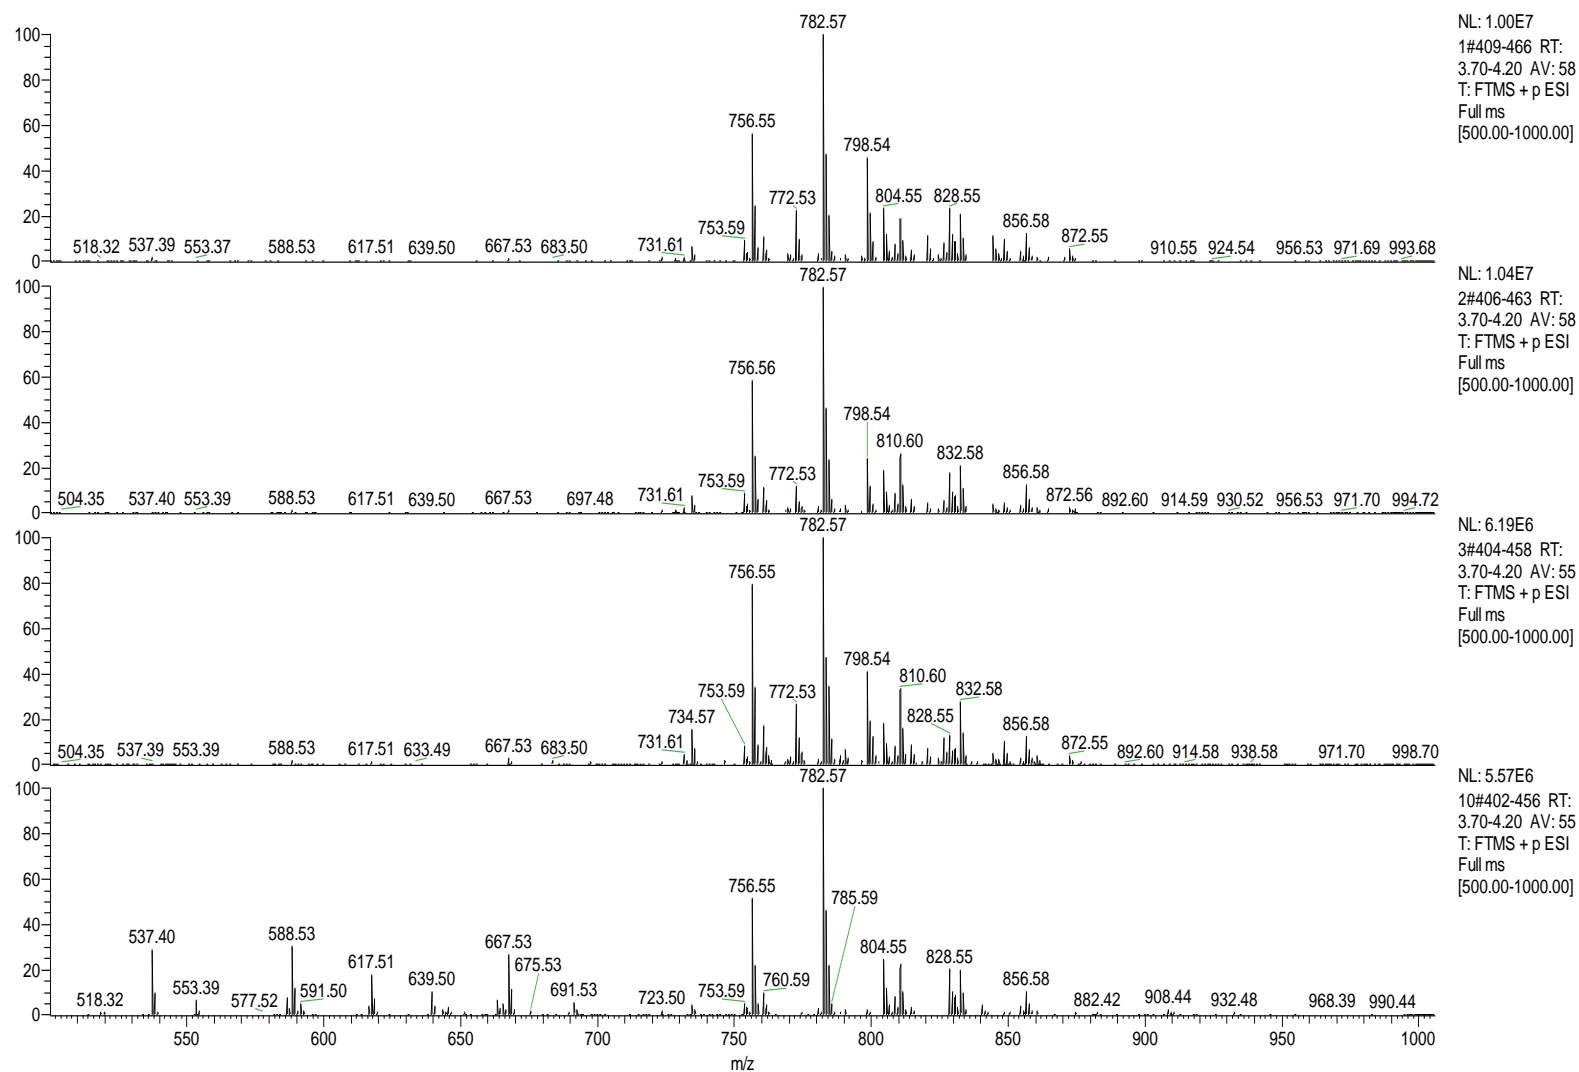

**Figure S3.** Mass spectra correspond to samples analyzed after incubation of samples in normal saline for 0 min, 35 minutes, 70 minutes, and 315 minutes (from top to bottom) at room temperature. Positive mode.

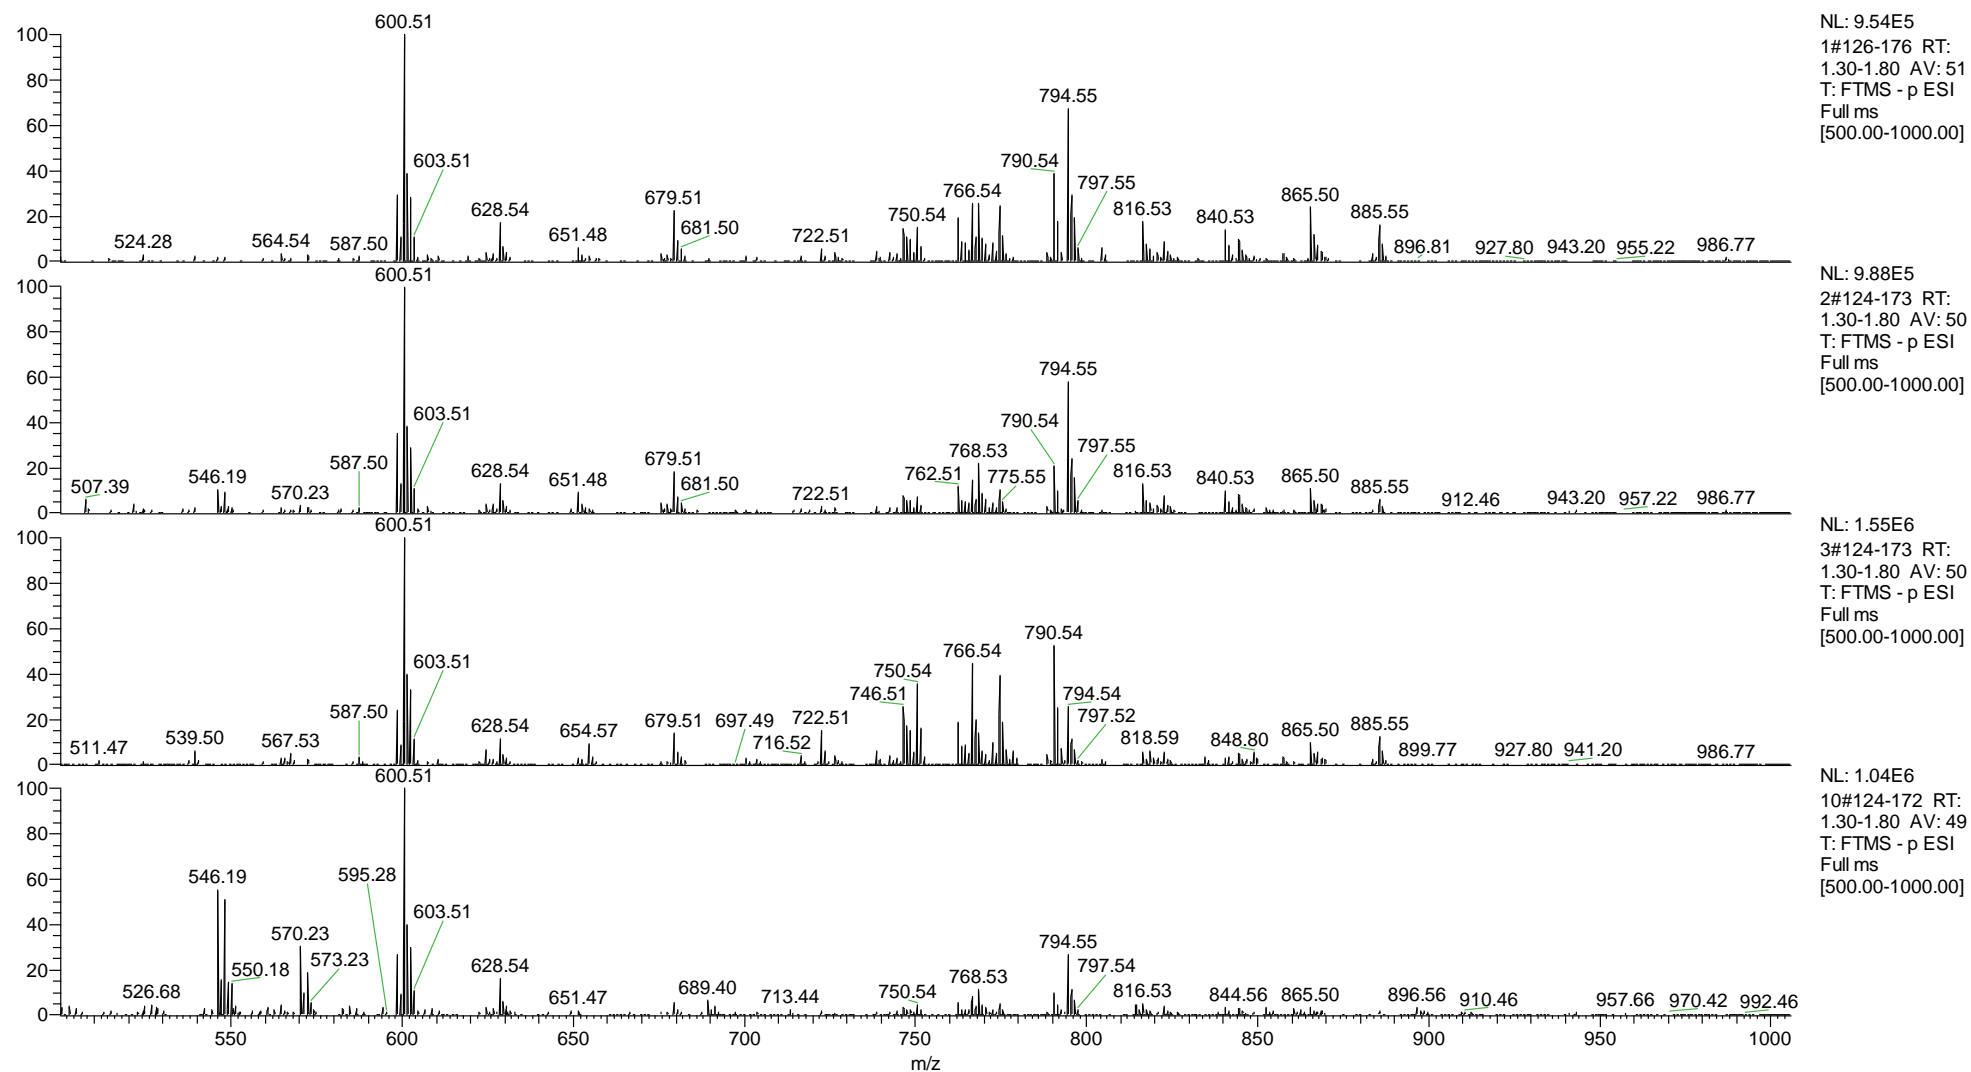

**Figure S4.** Mass spectra correspond to samples analyzed after incubation of samples in normal saline for 0 min, 35 minutes, 70 minutes, and 315 minutes (from top to bottom) at room temperature. Negative mode.

**Table S1.** Absolute intensities (counts) of the most intense ions (relative intensities above 10%) for samples analyzed after incubation of samples in normal saline. Positive mode.

| Mass   | 0 min    | 35 min   | 70 min   | 315 min  |
|--------|----------|----------|----------|----------|
| 537.39 | 194139,1 |          |          | 1613739  |
| 538.40 |          |          |          | 541146   |
| 553.37 | 103339,5 |          |          |          |
| 553.39 |          |          |          | 360669,8 |
| 554.39 |          |          |          | 105997,8 |
| 586.52 |          |          |          | 432173,8 |
| 587.52 |          |          |          | 157060,7 |
| 588.53 |          | 110743,3 | 112306,9 | 1705294  |
| 589.54 |          |          |          | 665425,7 |
| 590.54 |          |          |          | 107767,4 |
| 591.50 |          |          |          | 267047,2 |
| 616.56 |          |          |          | 218722,2 |
| 617.51 |          |          |          | 995620,2 |
| 618.51 |          |          |          | 405613,8 |
| 639.49 |          |          |          | 563669,8 |
| 640.50 |          |          |          | 221047,3 |
| 643.53 |          |          |          | 143011,2 |
| 645.54 |          |          |          | 195905,7 |
| 663.50 |          |          |          | 360983,8 |
| 664.50 |          |          |          | 153039   |
| 665.51 |          |          |          | 292406,4 |
| 666.52 |          |          |          | 119320,2 |
| 667.53 | 147546,9 | 163969,1 | 169335,3 | 1474643  |
| 668.53 |          |          |          | 642489,5 |
| 669.53 |          |          |          | 132726,7 |
| 683.50 | 101759   |          | 104270,3 |          |
| 691.53 |          |          |          | 309849,7 |
| 692.53 |          |          |          | 132827   |
| 697.48 |          | 102290,2 |          |          |
| 723.49 | 165226,1 | 156887,9 |          | 102433,1 |
| 728.52 | 108560   | 112631,2 |          |          |
| 731.61 | 188585,3 | 220916,9 | 268711,2 |          |
| 732.61 |          |          | 112001,8 |          |
| 734.57 | 661237,6 | 821808,1 | 982386,2 | 258758,2 |
| 735.57 | 281805,6 | 345575,8 | 437904,3 | 142767,1 |
| 746.51 |          |          | 100989,8 |          |
| 751.57 | 103737,5 |          |          |          |
| 753.59 | 906480,1 | 915987,8 | 492581,7 | 292983,1 |
| 754.54 | 374974,7 | 341179,8 | 171644,1 | 190870,5 |
| 754.59 | 396200,8 | 390634,2 | 214355,2 | 118710,7 |
| 755.54 | 158154,4 | 141078,4 |          |          |

|        |          |          |          |          |
|--------|----------|----------|----------|----------|
| 756.55 | 5670315  | 6063729  | 4921470  | 2879660  |
| 757.55 | 2471793  | 2622987  | 2120116  | 1226102  |
| 758.56 | 586865,4 | 649977,6 | 533850   | 288405,5 |
| 760.58 | 1102789  | 1193853  | 1061295  | 556500   |
| 761.59 | 487615,2 | 560984,7 | 483126,8 | 254409,5 |
| 762.60 | 125450,8 | 162803,7 | 258873,4 |          |
| 768.59 | 104374,1 | 161357,6 |          |          |
| 769.56 | 337526,9 | 225907,3 | 159525,1 |          |
| 770.51 | 294389,4 | 218923,6 | 211134,7 |          |
| 770.57 | 187370,4 | 137237,1 | 109596,5 |          |
| 771.51 | 125533,4 |          |          |          |
| 772.53 | 2260661  | 1209932  | 1658167  |          |
| 773.53 | 988729,1 | 534961,9 | 731517,7 |          |
| 774.54 | 318240,5 | 300576,9 | 343760,6 |          |
| 775.55 |          | 120878,7 | 123461,3 |          |
| 780.56 | 327965,3 | 308254,4 | 141803,4 | 172549   |
| 781.56 | 149251,2 | 137667,4 |          |          |
| 782.57 | 10031188 | 10379485 | 6192565  | 5570574  |
| 783.57 | 4748582  | 4810066  | 2939630  | 2592360  |
| 784.58 | 2044158  | 2431479  | 2137080  | 1220756  |
| 785.59 | 461620,1 | 613890,2 | 711373   | 284623,2 |
| 786.51 | 213389   | 217737,7 | 137305   |          |
| 786.59 |          |          | 124076,4 |          |
| 787.51 |          | 100164,5 |          |          |
| 788.62 | 133139   | 204571,3 | 232541,3 |          |
| 789.62 |          |          | 110387,1 |          |
| 790.54 | 289878   | 348945,8 | 411172,9 | 126741,8 |
| 791.54 | 136682,1 | 158176   | 191597,5 |          |
| 796.52 | 231423,8 | 160946,4 | 123916,4 |          |
| 796.58 | 100538,2 | 122583,5 |          |          |
| 797.53 | 110533,7 |          |          |          |
| 798.54 | 4598200  | 2525240  | 2524584  | 139135   |
| 799.54 | 2157744  | 1239880  | 1192800  |          |
| 800.55 | 856473,6 | 438812,1 | 768803,2 |          |
| 801.56 | 167690,2 | 143672,2 | 240341,4 |          |
| 804.55 | 2344412  | 1958072  | 1131496  | 1365281  |
| 805.55 | 1189750  | 959685,6 | 563377,7 | 661840   |
| 806.51 | 129991,2 |          | 150322,9 |          |
| 806.56 | 442480,2 | 378657,1 | 204184,6 | 238724,9 |
| 807.57 | 177569,2 | 154469,6 |          |          |
| 808.58 | 749146   | 880020,8 | 524167,8 | 444157,5 |
| 809.58 | 348969,1 | 386094,2 | 241454,4 | 187713,6 |
| 810.60 | 1955093  | 2742696  | 2096127  | 1240616  |
| 811.60 | 911425   | 1311966  | 1010915  | 584374,6 |
| 812.60 | 224113,9 | 319891,4 | 264929,1 | 134906,5 |
| 814.54 | 525637,4 | 640950,8 | 544196,1 | 183540,4 |

|        |          |          |          |          |
|--------|----------|----------|----------|----------|
| 815.54 | 269185,6 | 318994,8 | 270862,9 |          |
| 820.52 | 1141064  | 448476,8 | 439795,8 |          |
| 821.53 | 545652,1 | 213547,8 | 205014,4 |          |
| 822.53 | 151269,4 |          |          |          |
| 824.55 | 309787,5 | 179965,3 | 169214,4 |          |
| 825.56 | 150409,3 |          |          |          |
| 826.56 | 838598,6 | 566090,2 | 745580,8 |          |
| 827.57 | 377513,5 | 266278,8 | 343735,3 |          |
| 828.55 | 2344843  | 1863798  | 789982,7 | 1134586  |
| 829.55 | 1168751  | 978259,6 | 390361,1 | 587942   |
| 830.50 | 255195,6 | 137793,8 | 217936   |          |
| 830.56 | 934901,5 | 806785,3 | 442963,9 | 488618,6 |
| 831.51 | 126579,4 |          | 106349,6 |          |
| 831.57 | 359927,9 | 325009,1 | 195748,7 | 193256,5 |
| 832.58 | 2110535  | 2174888  | 1726140  | 1114555  |
| 833.59 | 1022612  | 1115705  | 871831,5 | 547523,6 |
| 834.59 | 275975,8 | 295521,1 | 251761,7 | 129412,6 |
| 840.53 |          |          |          | 252390,7 |
| 841.53 |          |          |          | 115336,4 |
| 844.52 | 1158369  | 436790,2 | 300797,8 |          |
| 845.53 | 563606,5 | 197747,8 | 142878,4 |          |
| 846.53 | 352441,8 | 130846,6 | 138973,6 |          |
| 847.54 | 145714   |          |          |          |
| 848.54 | 956052,9 | 464093,5 | 623552,4 |          |
| 848.66 |          | 137653,6 |          |          |
| 849.56 | 461769,4 | 231304,4 | 303147,1 |          |
| 850.57 | 147576,2 |          |          |          |
| 850.67 |          | 117698,6 |          |          |
| 854.56 | 472603,6 | 380821,1 | 175719,7 | 224665,4 |
| 855.57 | 239722,6 | 191133,6 |          | 110908,8 |
| 856.58 | 1245971  | 1280513  | 779973,9 | 577902,2 |
| 857.58 | 617752   | 658085,3 | 395470,8 | 274440,8 |
| 858.59 | 225522,9 | 264447,6 | 196448,7 | 113336,2 |
| 860.61 | 179493,6 | 236593,8 | 244210,6 | 105676,2 |
| 861.62 |          | 116227   | 123973,4 |          |
| 864.57 | 205401   | 216002,3 |          |          |
| 865.57 |          | 102539,5 |          |          |
| 870.54 | 202043,6 |          |          |          |
| 871.55 | 102145,9 |          |          |          |
| 872.55 | 533132,6 | 264750,5 | 261993,9 |          |
| 873.56 | 261825,6 | 131249,8 | 131059,4 |          |
| 874.54 | 152444,6 | 179477,1 |          |          |

**Table S2.** Absolute intensities (counts) of the most intense ions (relative intensities above 10%) for samples analyzed after incubation of samples in normal saline. Negative mode.

| Mass   | 0 min    | 35 min   | 70 min   | 315 min  |
|--------|----------|----------|----------|----------|
| 546.19 |          |          |          | 572655   |
| 547.19 |          |          |          | 164449,8 |
| 548.19 |          |          |          | 531257,5 |
| 549.19 |          |          |          | 151014,8 |
| 550.18 |          |          |          | 145488,2 |
| 570.23 |          |          |          | 317049,4 |
| 571.23 |          |          |          | 100281,1 |
| 572.23 |          |          |          | 193550   |
| 598.49 | 278404,9 | 346253,1 | 370710,9 | 274658,1 |
| 599.50 | 102247,2 | 129467   | 135089,3 |          |
| 600.51 | 953755,7 | 988263,7 | 1547157  | 1037186  |
| 601.51 | 372064   | 381524,2 | 615425,8 | 412279,8 |
| 602.51 | 272359   | 283625,9 | 514082,1 | 309823,2 |
| 603.51 | 102692   | 105252,3 | 177322   | 114205,2 |
| 628.54 | 164839,1 | 129741,7 | 176705,5 | 167049,3 |
| 654.56 |          |          | 142070,4 |          |
| 679.51 | 213332,5 | 180561,6 | 213253,3 |          |
| 722.51 |          |          | 231881,4 |          |
| 746.51 | 137822,5 |          | 396183,8 |          |
| 747.52 | 104447,2 |          | 262452,3 |          |
| 748.53 |          |          | 234069,2 |          |
| 750.54 | 145987,5 |          | 550561,2 |          |
| 751.55 |          |          | 246096,3 |          |
| 762.51 | 183822,5 | 115312,7 | 292874,2 |          |
| 763.51 |          |          | 129303,4 |          |
| 764.52 |          |          | 136654,7 |          |
| 766.54 | 245981,2 | 143039,8 | 688790,4 |          |
| 767.54 | 105881,8 |          | 309925,5 |          |
| 768.53 | 243637,8 | 216507,3 | 220399,3 | 118589,1 |
| 772.53 |          |          | 149024,7 |          |
| 774.54 | 234697,2 | 103976,2 | 611269,1 |          |
| 775.55 | 109086,2 |          | 294365,4 |          |
| 776.56 |          |          | 106050,4 |          |
| 790.54 | 372874,9 | 208560,8 | 813421,7 | 100922,6 |
| 791.54 | 167562   |          | 385141,2 |          |
| 792.55 |          |          | 112674   |          |
| 794.55 | 642902,2 | 569998,1 | 395477,8 | 275557,3 |
| 795.55 | 277641,2 | 237268,9 | 177017,1 | 116057,1 |
| 796.54 | 182489,1 | 154693,2 | 103789   |          |
| 816.53 | 170255   | 126263,4 |          |          |
| 840.53 | 133579,5 |          |          |          |



|        |          |          |          |  |
|--------|----------|----------|----------|--|
| 865.50 | 230416,2 | 105360,5 | 155457,7 |  |
| 866.51 | 113368,5 |          |          |  |
| 885.55 | 152392,7 |          | 190630,1 |  |

**Table S3.** The description of samples, obtained from each animal. The time from brain removal to sample freezing is provided in the first column. The samples from each hemisphere were taken in random order, except for 12 additional samples from a third animal that was resected from identical brain regions. The time for the first set of samples is not the same as the time required for organ removal, bisecting, and blood removal is slightly varying.

|               | Animal 1        |               |                  |               | Animal 2        |               |                  |               | Animal 3                                                                             |                  |
|---------------|-----------------|---------------|------------------|---------------|-----------------|---------------|------------------|---------------|--------------------------------------------------------------------------------------|------------------|
|               | Left hemisphere |               | Right hemisphere |               | Left hemisphere |               | Right hemisphere |               | Left hemisphere                                                                      | Right hemisphere |
| Temp.         | +4°C            | +4°C          | +20°C            | +20°C         | +20°C           | +20°C         | +4°C             | +4°C          | +4°C                                                                                 | +20°C            |
| Storage media | Water           | Normal saline | Water            | Normal saline | Water           | Normal saline | Water            | Normal saline | Normal saline                                                                        | Normal saline    |
| Washing media | Normal saline   | Water         | Water            | Normal saline | Water           | Normal saline | Normal saline    | Water         | Normal saline                                                                        | Water            |
| 2-4 min       | 2 samples       | 2 samples     | 2 samples        | 2 samples     | 2 samples       | 2 samples     | 2 samples        | 2 samples     | 3 samples                                                                            | 3 samples        |
| 10 min        | 2 samples       | 2 samples     | 2 samples        | 2 samples     | 2 samples       | 2 samples     | 2 samples        | 2 samples     | 3 samples                                                                            | 3 samples        |
| 15 min        | 2 samples       | 2 samples     | 2 samples        | 2 samples     | 2 samples       | 2 samples     | 2 samples        | 2 samples     | 3 samples                                                                            | 3 samples        |
| 20 min        | 2 samples       | 2 samples     | 2 samples        | 2 samples     | 2 samples       | 2 samples     | 2 samples        | 2 samples     | 3 samples                                                                            | 3 samples        |
| 35 min        | 2 samples       | 2 samples     | 2 samples        | 2 samples     | 2 samples       | 2 samples     | 2 samples        | 2 samples     | 3 samples                                                                            | 3 samples        |
| 60 min        | 2 samples       | 2 samples     | 2 samples        | 2 samples     | 2 samples       | 2 samples     | 2 samples        | 2 samples     | 3 samples                                                                            | 3 samples        |
| Comment       |                 |               |                  |               |                 |               |                  |               | Additional 6 samples from each hemisphere were set aside for the immediate analysis. |                  |
